# Supplementary material for: Saponin-based adjuvants induce cross-presentation in dendritic cells by intracellular lipid body formation
Source: PubMed Central journal article supplement (PMC5103066; doi:10.1038/ncomms13324), 2016-11-07
Supplement: ncomms13324-s1.pdf [file ncomms13324-s1.pdf]

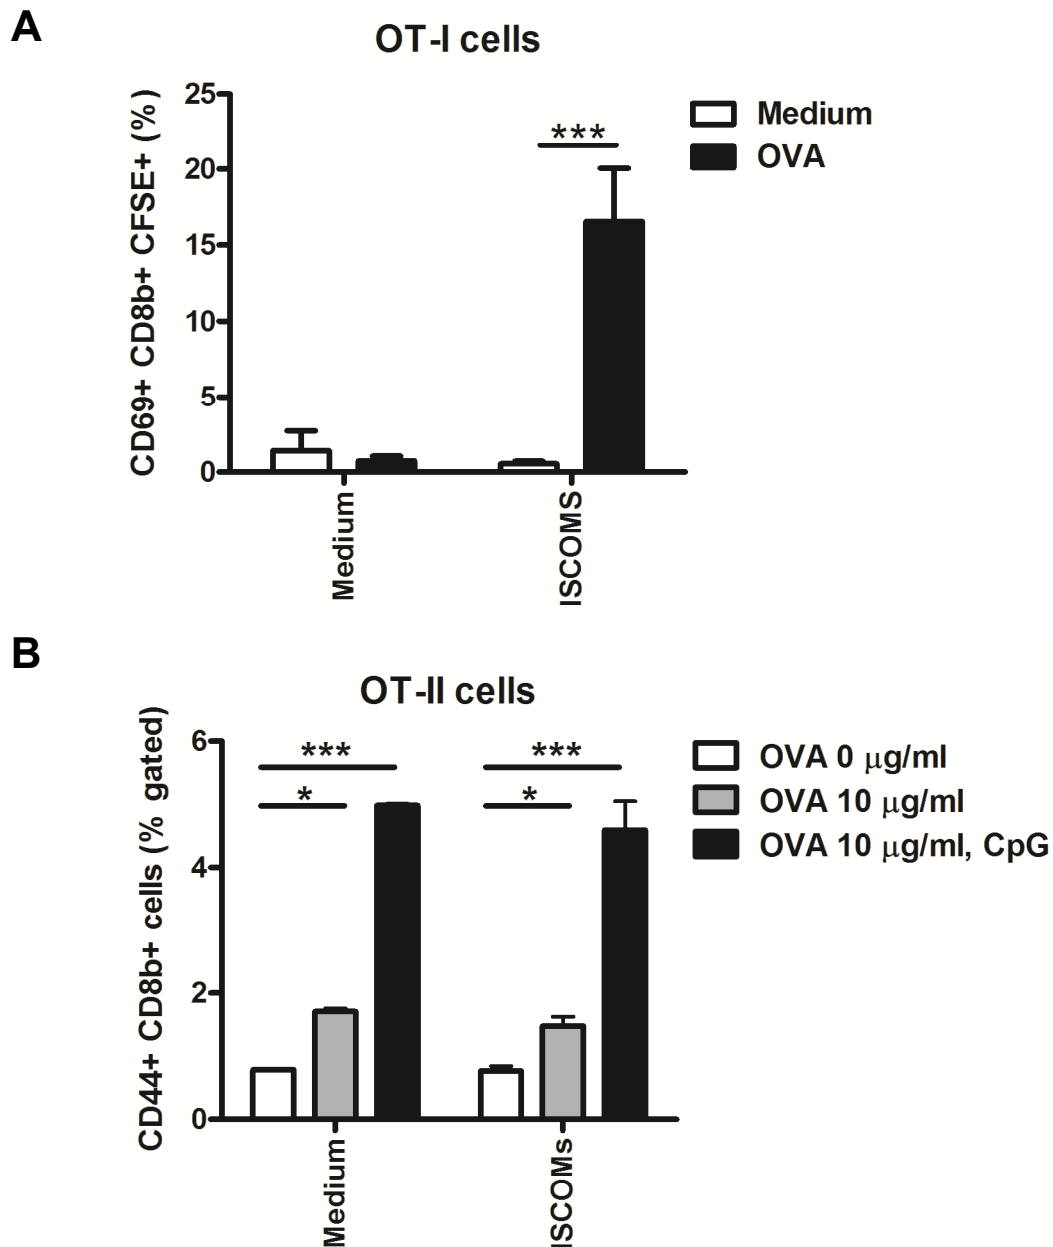

**Supplementary figure 1. ISCOM adjuvant enhances MHC-I, but not MHC-II presentation of exogenous antigens. (A-B) *In vitro* OT-I and OT-II antigen presentation assays.** GM-CSF-cultured BMDCs were exposed to the indicated compounds for 5 hrs, washed, and co-cultured with CFSE-labeled OT-I or OT-II cells. After one day, the expression of the early activation marker CD69 was measured on CD8 $\beta$ -gated, CFSE+ OT-I cells (A). Data depict mean percentages of CD69/CD8 $\beta$ /CFSE positive cells. After three days, the expression of the late activation marker CD44 and dilution of CFSE was measured on the OT-II cells (B). Data depict mean percentages of CD44 positive/CFSE low cells. The co-stimulation dependency of OT-I/II cells is illustrated by the addition of 0.1  $\mu\text{g/ml}$  CpG. Statistical analyses were done using two way ANOVA with post hoc Bonferroni tests.

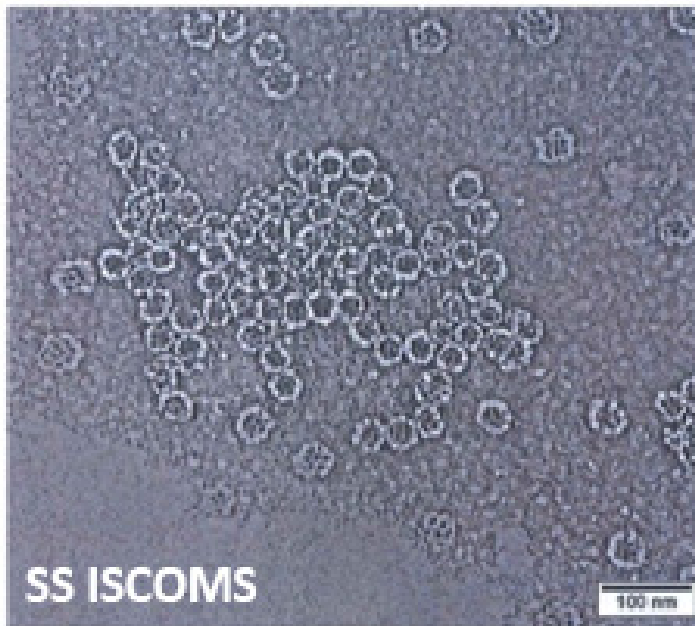

**Supplementary figure 2. 'Open Access' ISCOM adjuvants have the correct shape and size.** EM picture showing correct size ( $\pm 40$  nm) and shape (cage-like round) of ISCOM structures made via an 'open access method' using SS saponin. Scale bar: 100 nm

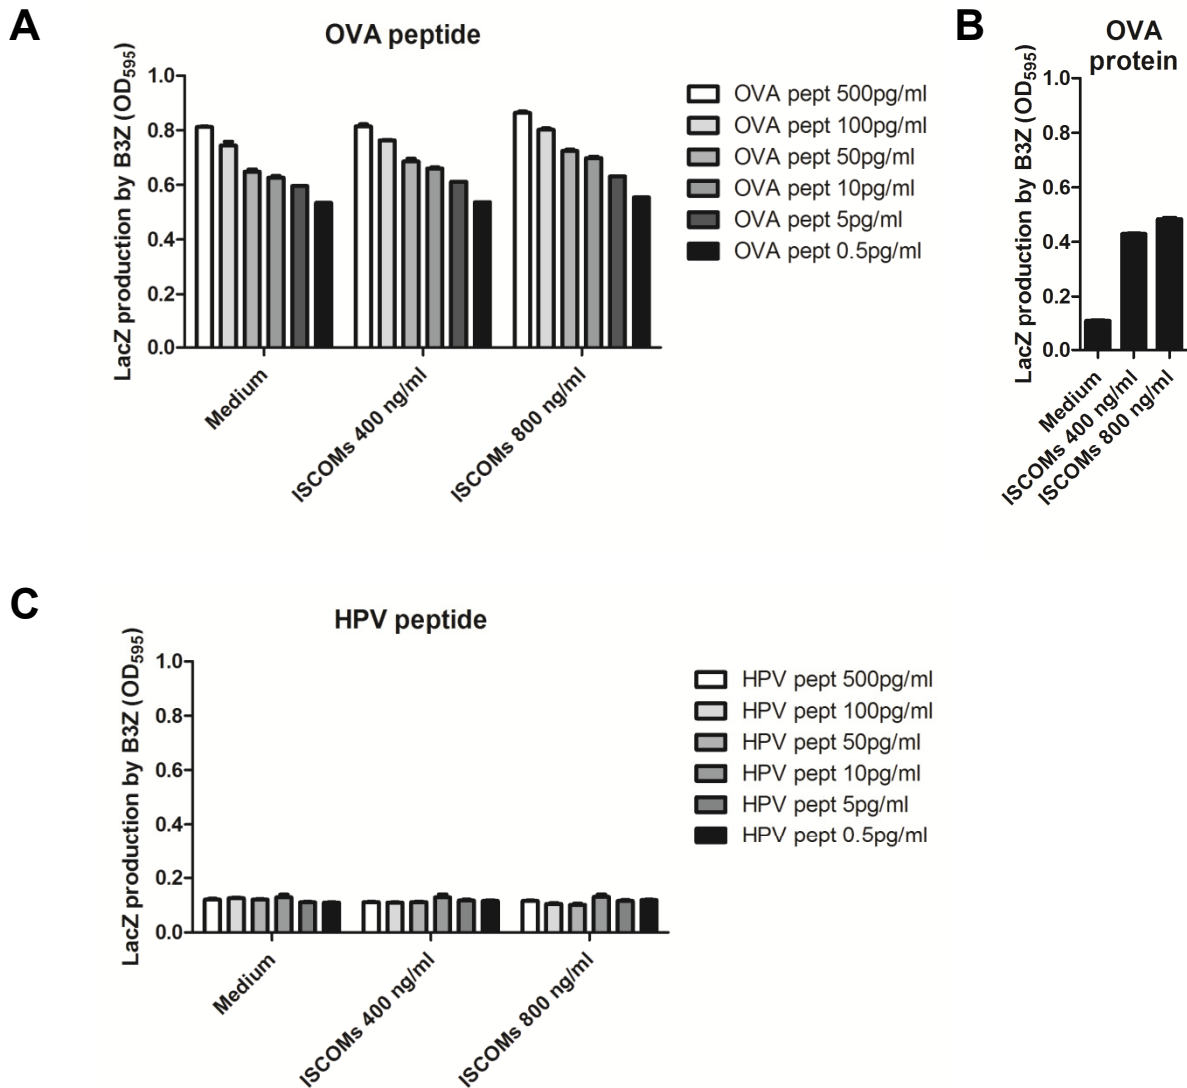

**Supplementary figure 3. B3Z reaction to externally pulsed peptide dilutes normally and is not influenced by SBA addition.** *In vitro* cross-presentation assay using B3Z cells. GM-CSF BMDCs were exposed for 5 hrs to ISCOMs (400 or 800 ng/ml) or medium. In this period, cells received medium (A and C) or 80 µg/ml OVA protein (B). After washing, cells were externally pulsed for 30 minutes with the indicated amounts of OVA or HPV K<sup>b</sup> peptide. After washing, cells were incubated o/n with the B3Z cells. Data represent single values in titration.

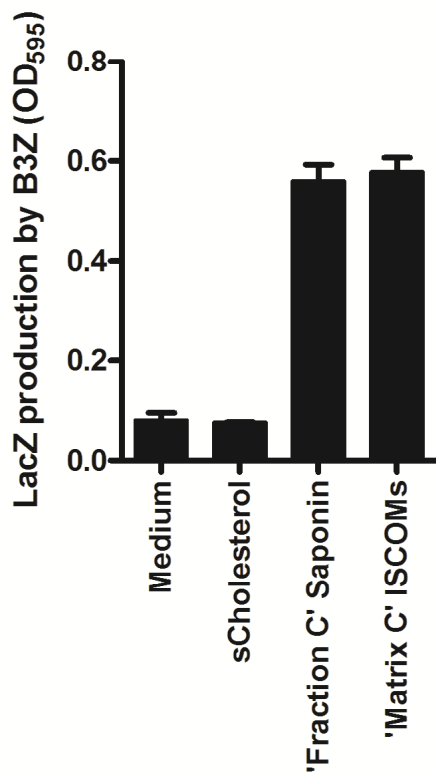

**Supplementary figure 4. Saponins in the ISCOM structures are the active component inducing cross-presentation.** Quantification of cross-presentation in GM-CSF BMDCs following 5 hrs exposure to solubilized cholesterol, 'Fraction C' saponin, or 'Matrix C' ISCOMs (made with Fraction C saponin) (all 400 ng/ml). Other components of ISCOMs are water-insoluble. Similar data were obtained in two independent experiments.

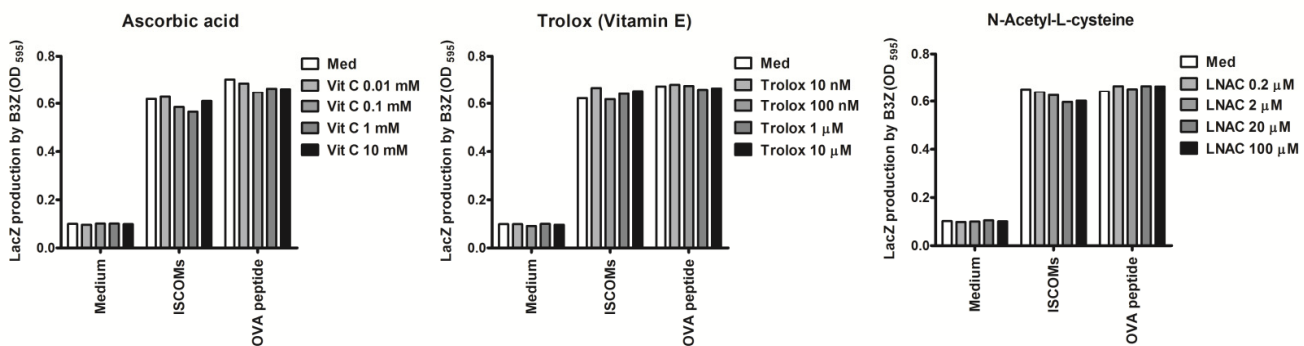

**Supplementary figure 5. SBA-induced cross-presentation is not caused by endosomal ROS.** *In vitro* cross-presentation assay in the presence of the indicated amounts of three ROS scavengers. Compounds were added during the 5 hr exposure period to ISCOMs. Data represent single values in titration. Similar data were obtained in two independent experiments.

**A**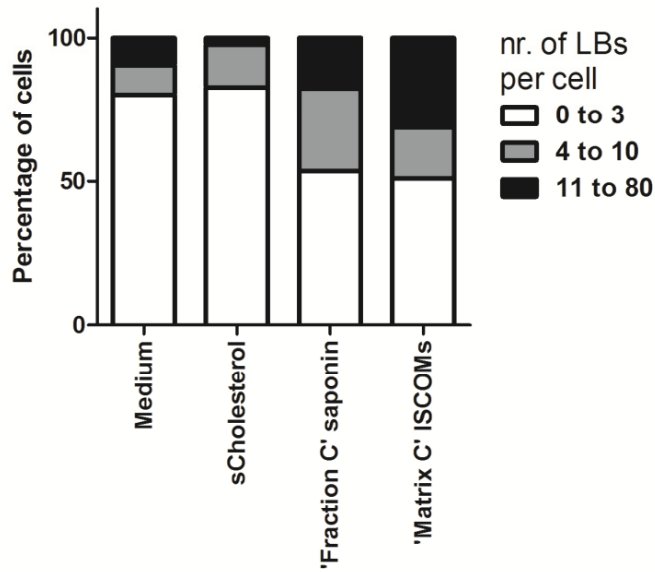**B**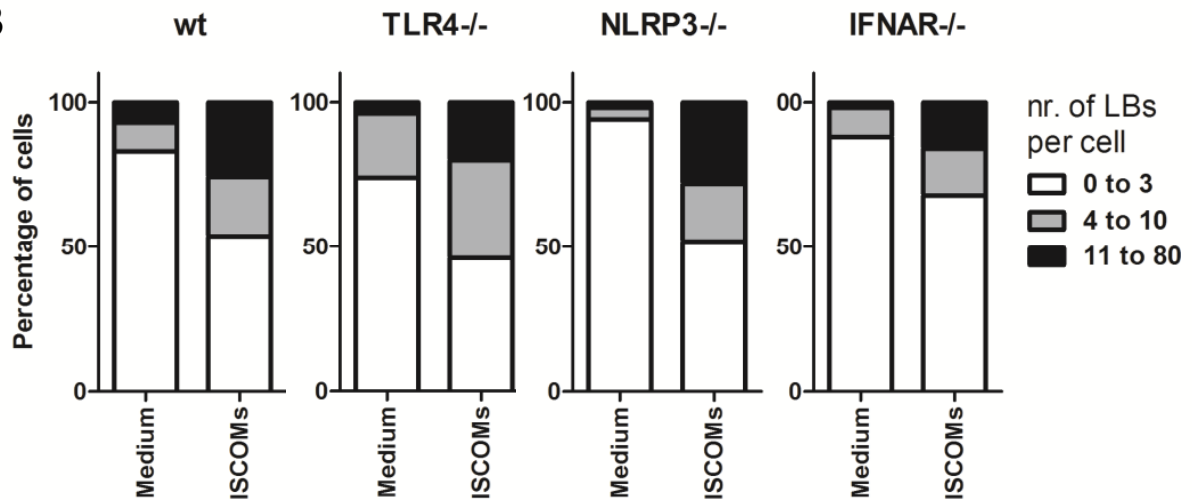

**Supplementary figure 6. Saponins in the ISCOM structures are the active component inducing LBs, and LB induction is normal in various knockout DCs.** (A) Quantification of LBs in GM-CSF BMDCs following 5 hrs exposure to solubilized cholesterol, 'Fraction C' saponin, or 'Matrix C' ISCOMs (made with Fraction C saponin) (all 400 ng/ml). Other components of ISCOMs are water-insoluble. Similar data were obtained in two independent experiments. (B) LB quantification in GM-CSF BMDCs from wild-type, TLR4<sup>-/-</sup>, NLRP3<sup>-/-</sup>, or type I IFN receptor<sup>-/-</sup> mice.

**A**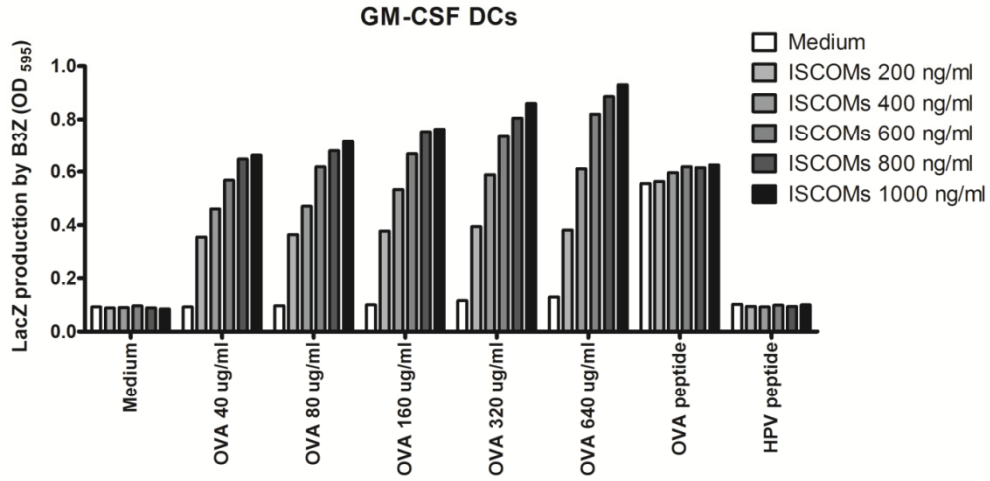**B**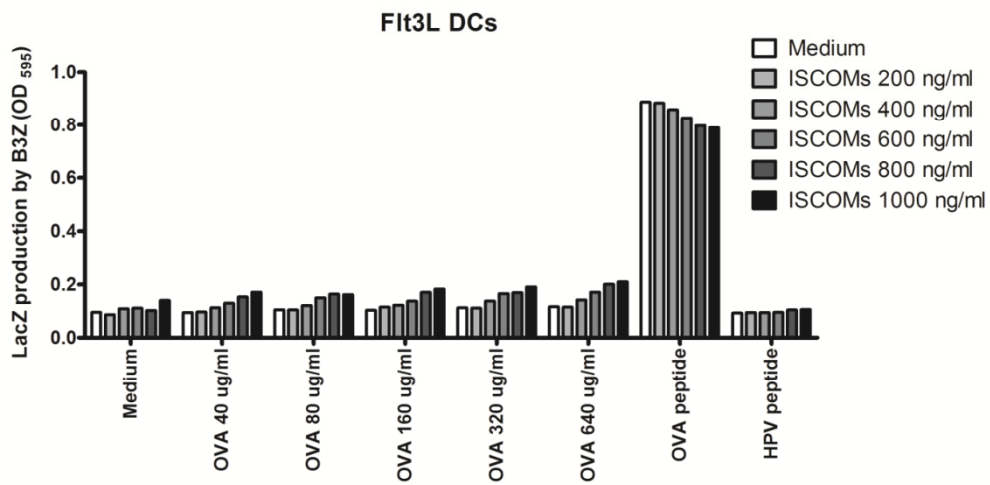**C**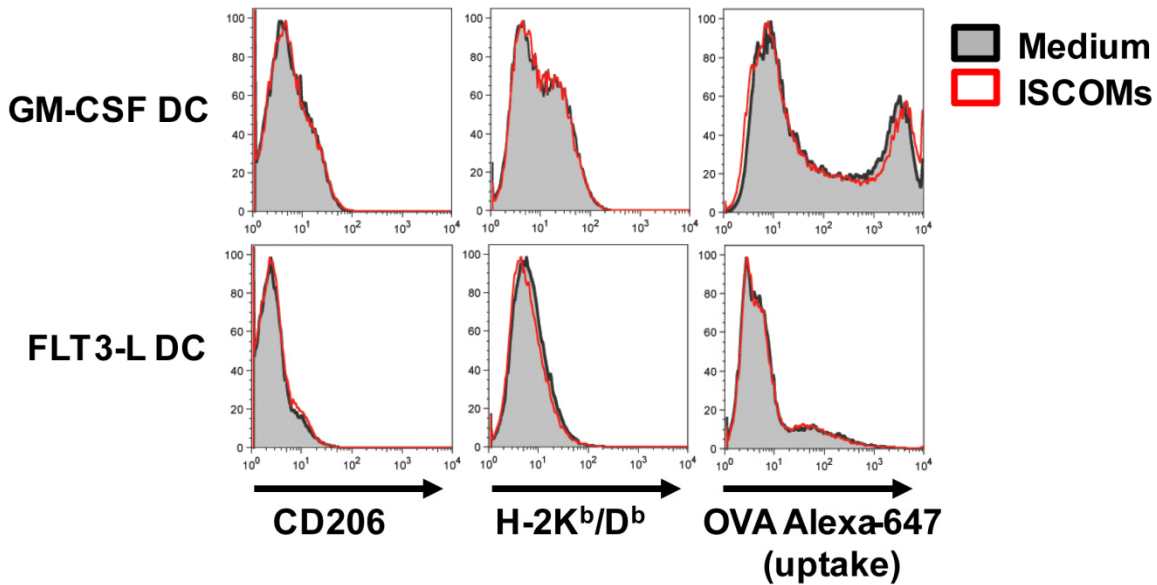

Supplementary figure 7: legends on next page

**Supplementary figure 7. ISCOM adjuvant induces cross-presentation only in GM-CSF-cultured BMDCs.** (A and B) *In vitro* cross-presentation after 5 hrs exposure of GM-CSF BMDCs or Flt3-L BMDCs to wide concentration ranges of OVA and ISCOMs. External peptide pulsing was used to control for viability and/or MHC-I levels. Data represent single values in titration. Similar results were obtained in two independent experiments. (C) FACS analysis of GM-CSF BMDCs or Flt3-L BMDCs. Cells were exposed for 5 hrs to medium, ISCOMs or 0.25 µg/ml OVA coupled to the fluorophore Alexa647. Next, cells were processed for FACS stainings with anti CD206 (mannose receptor), or anti MHC-I antibodies. The filled black lines show the medium-treated cells, while the open red lines are the ISCOM treated samples.



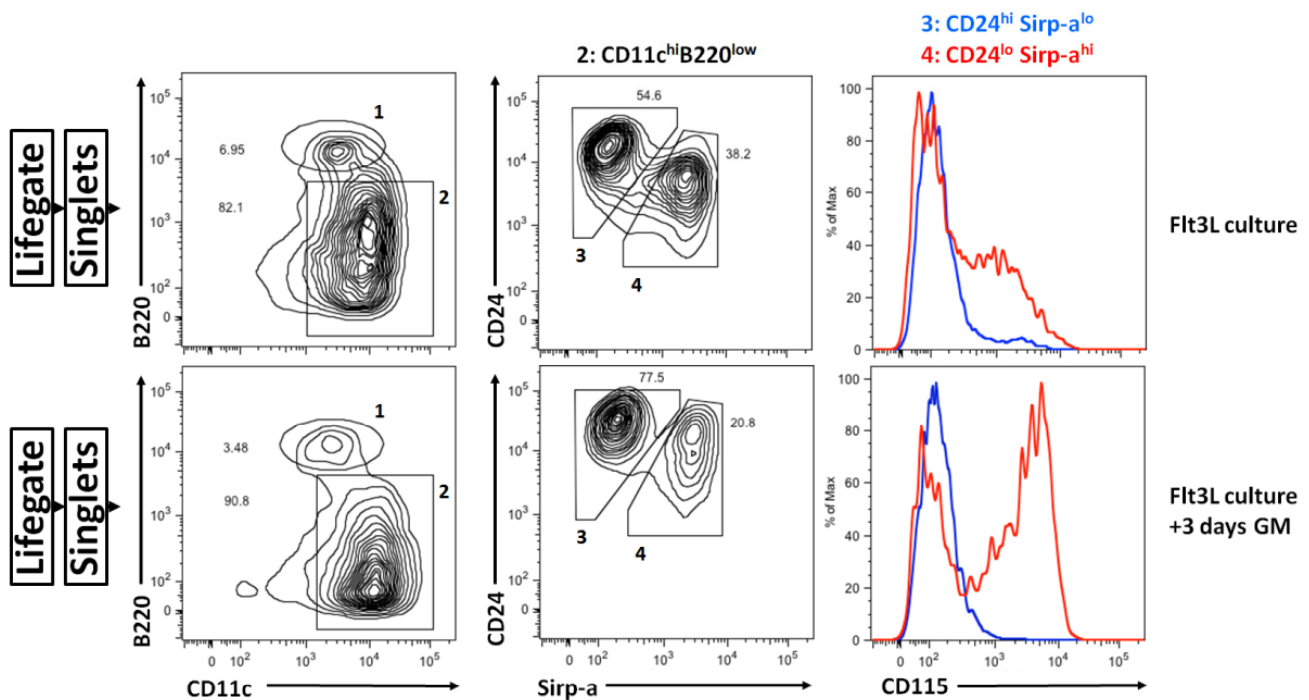

**Supplementary figure 8. Gating strategy of FIt3-L cultures exposed to GM-CSF for an additional 72 hrs.** Corresponding to figure 4I (left panel) the entire day 10 FIt3-L culture was supplemented with GM-CSF for another 72 hr, after which the resulting populations were sorted (Gate 1 pDCs, 3 CD8 $\alpha$ + DCs, and gate 4 CD11b+ DCs). Note that with GM-CSF, CD8 $\alpha$ + DCs increase at the expense of pDCs and CD11b+ DCs, similar as previously reported in Mayer et al<sup>1</sup>. Right panel shows additional staining for the monocytic marker CD115.

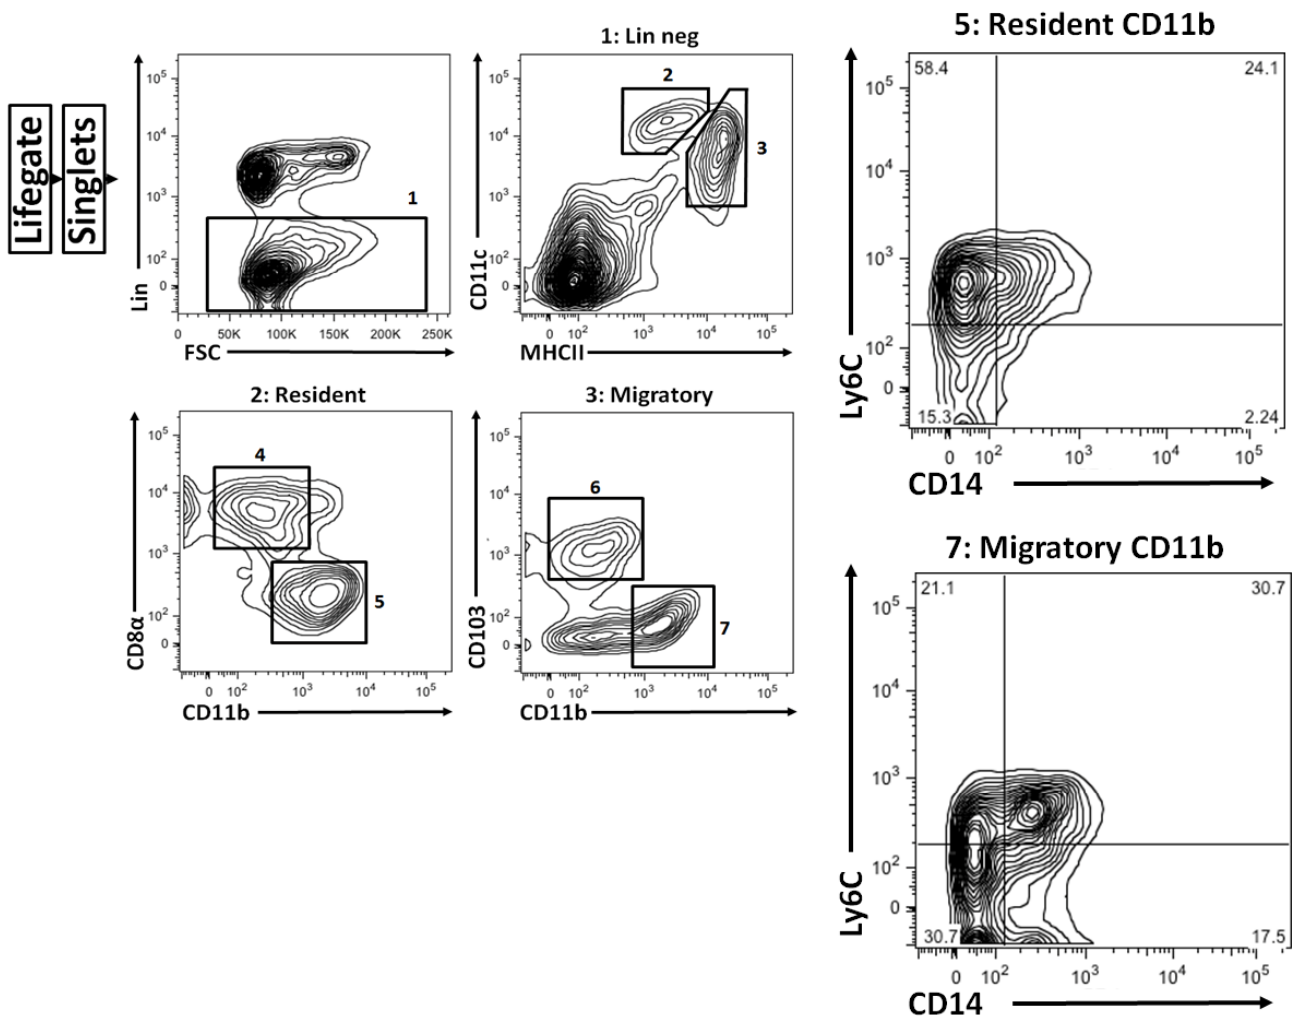

**Supplementary figure 9. Monocytic markers on resident and migratory CD11b+ DCs from lymph node.** Additional stainings were performed for the monocytic markers Ly6C and CD14 on the corresponding sorted cells from figure 5C.

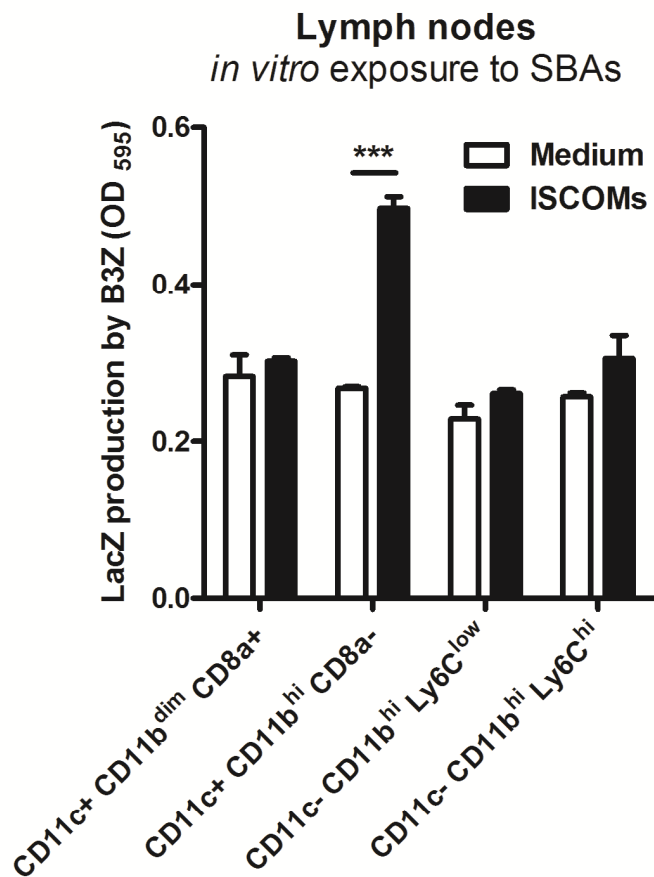

**Supplementary figure 10. Following cryo-ablation, only the CD11b<sup>hi</sup> DCs are able to cross-present OVA upon SBA exposure.** Cross-presentation assay on *ex vivo* isolated DC subsets following *in situ* tumor ablation. Established B16F10 melanomas (5-8mm diameter) were treated with cryo ablation and 50  $\mu$ g peritumorally injected CpG-ODN1668. 12 hours later draining lymph nodes were harvested and subjected to FACS sorting of four cell populations using the indicated markers. Different from the Flt3-L tumor assay in Fig. 5e, ablation with CpG does not induce a prominent pDC population (CD11c<sup>pos</sup>CD11b<sup>neg</sup>), but does create an influx of inflammatory monocytes (CD11c<sup>neg</sup>CD11b<sup>hi</sup>Ly6C<sup>hi</sup>). The populations were exposed *in vitro* for 5 hrs to the indicated compounds (ISCOMs 800 ng/ml, OVA 300  $\mu$ g/ml), after which cross-presentation was analyzed using the B3Z cell readout. Statistical analysis was done using two way ANOVA with post hoc Bonferroni tests.

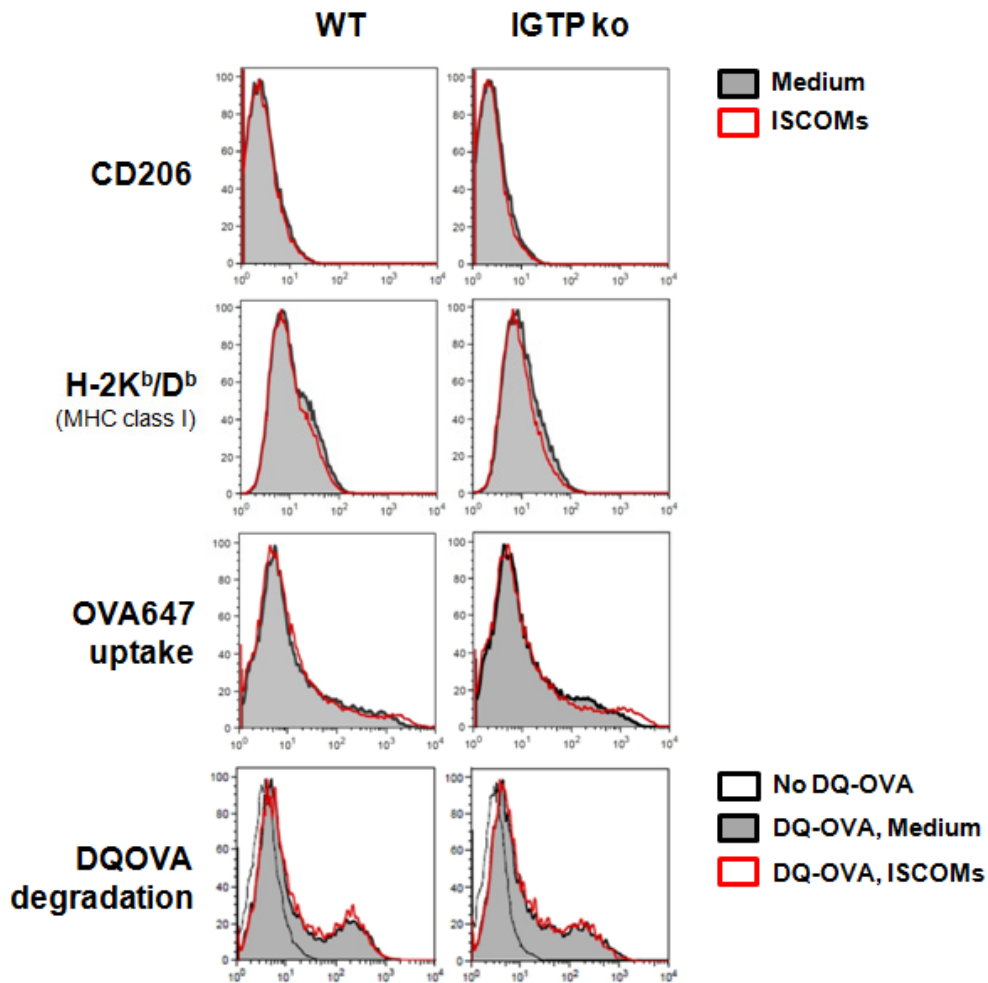

**Supplementary figure 11. SBA-exposed IGTP <sup>-/-</sup> and <sup>+/+</sup> BMDCs show equal levels of CD206, MHC-I (K<sup>b</sup>/D<sup>b</sup>), and takeup/degradation of OVA.** FACS analysis of GM-CSF DCs generated from bone-marrow from IGTP <sup>-/-</sup> and <sup>+/+</sup> mice. Cells were given medium, 0.25 µg/ml OVA coupled to the fluorophore Alexa647, or 1 µg/ml DQ-OVA, during the 5 hrs exposure time to medium or ISCOMs. DQ-OVA will start to fluoresce once degraded. Next, cells were processed for FACS stainings with anti CD206 (mannose receptor), or anti MHC-I antibodies. The filled black lines show the medium-treated cells, while the open red lines are the ISCOM treated samples.

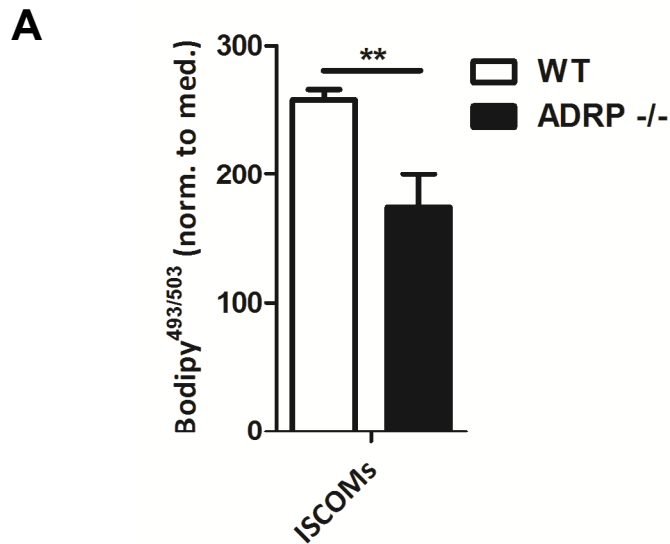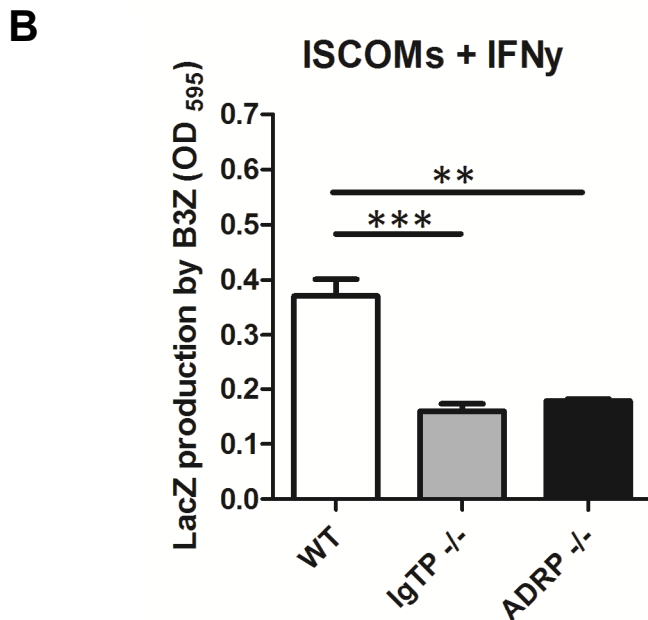

**Supplementary figure 12. ADRP<sup>-/-</sup> BMDCs show lower levels of LBs and cross-presentation under stimulation with SBAs.** (A) FACS analysis of GM-CSF DCs generated from bone-marrow from ADRP<sup>-/-</sup> and +/+ mice. Cells were stimulated for 5 hrs with ISCOMs, subsequently stained for LBs with the Bodipy dye, and analyzed by FACS. (B) ADRP or IGTP<sup>-/-</sup> cells were stimulated similar as above with ISCOMs, 250 ng/ml IFN $\gamma$ , and OVA. Next, cross-presentation was determined using the B3Z assay. Statistical analyses were done using one way ANOVA with post hoc Bonferroni tests. Similar results were obtained in two independent experiments.

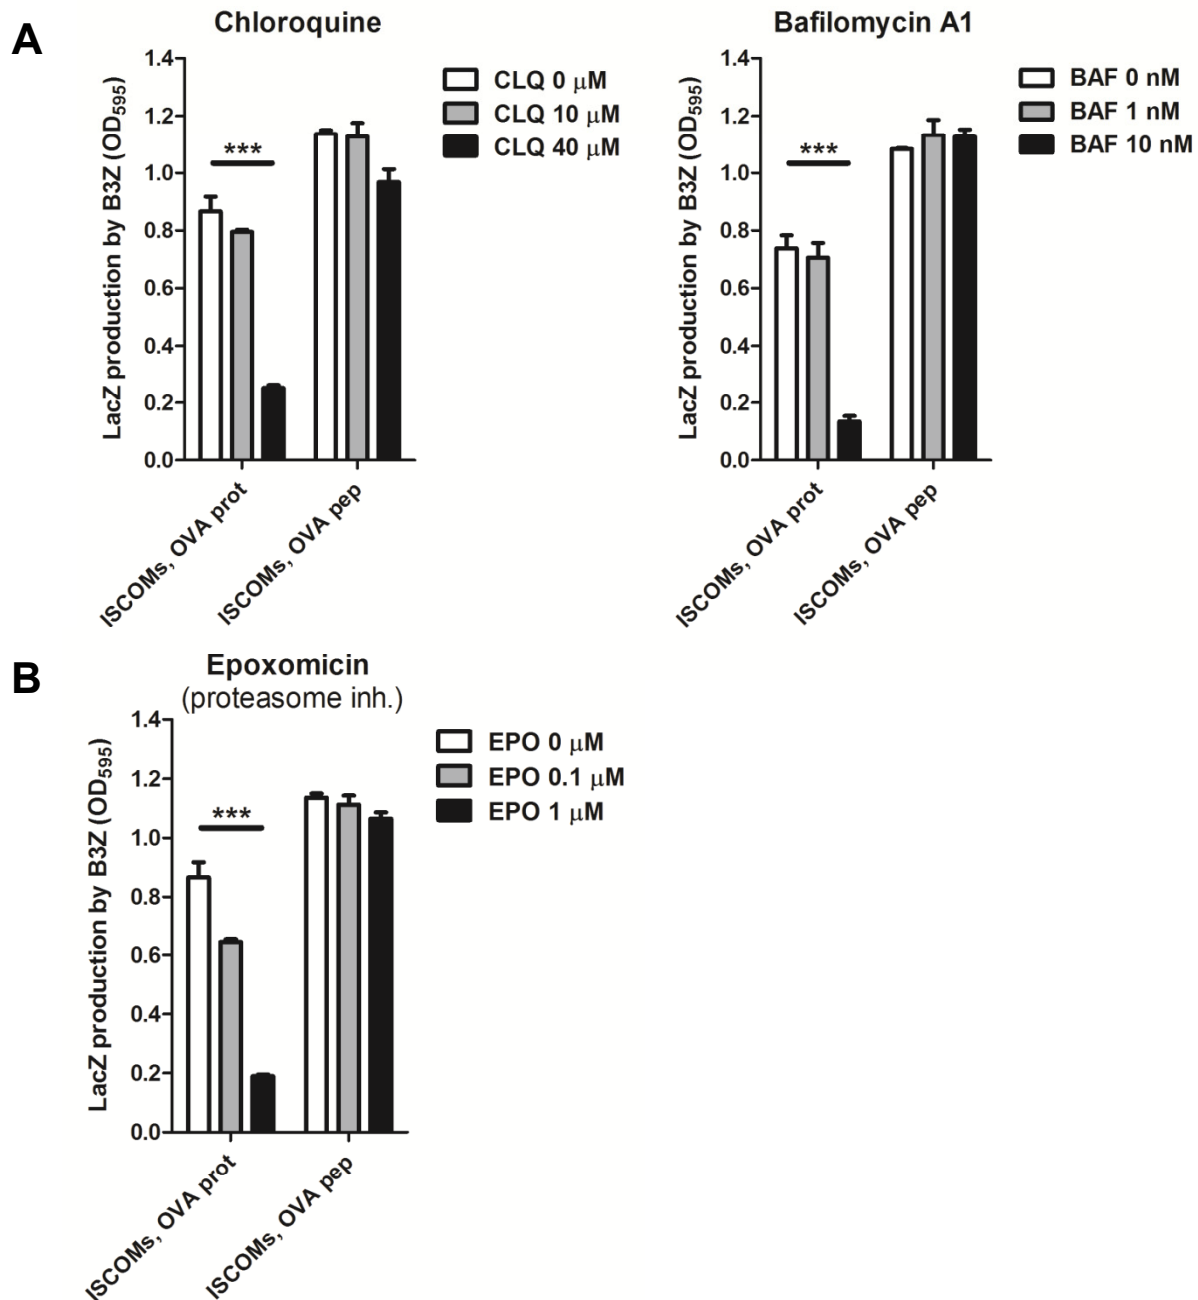

**Supplementary figure 13. Endosomal acidification and the proteasome are needed for SBA-aided cross-presentation.** *In vitro* cross-presentation assays after 5 hrs exposure of GM-CSF BMDCs to ISCOMs or the indicated concentrations of inhibitors of endosomal acidification ((A) Chloroquine and Bafilomycin A1) and the proteasome ((B) Epoxomicin). External peptide pulsing with OVA K<sup>b</sup> peptide was used to control for viability and/or MHC-I levels. Statistical analysis was done using two way ANOVA with post hoc Bonferroni tests. Similar results were obtained in two independent experiments.

**A**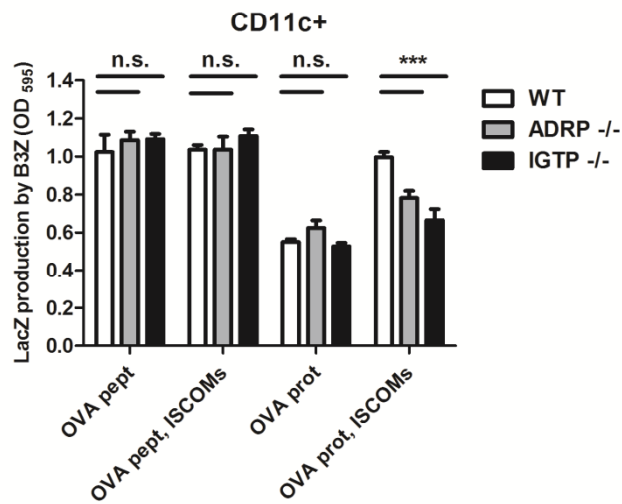**B**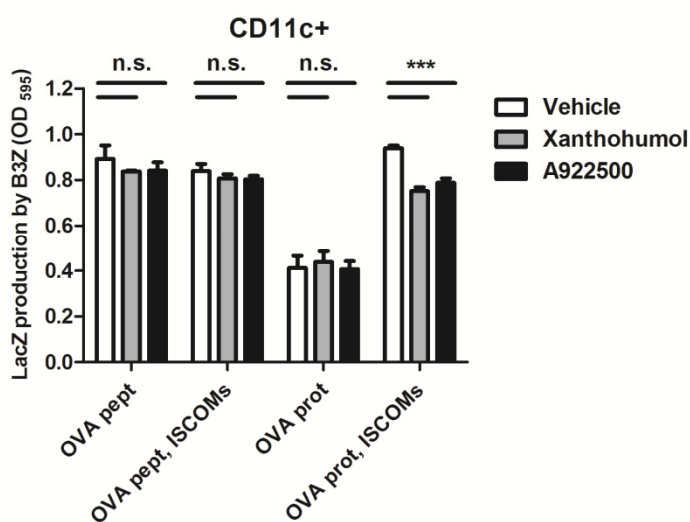

**Supplementary figure 14. *In vivo* cross-presentation in ADRP or IGTP knockout mice, or after pharmacological LB inhibition. *In vitro* cross-presentation assays on *ex vivo* isolated lymph node DCs using B3Z cells as a readout. (A) Wild-type, IGTP<sup>-/-</sup>, or ADRP<sup>-/-</sup> knockout mice were injected with 300 µg endofree OVA protein or 40 µg OVA K<sup>b</sup> peptide, with or without 30 µg ISCOMs. 12 hrs later, draining lymph nodes were harvested from which CD11c<sup>+</sup> cells were isolated that entered the cross-presentations assays. B3Z cells were analyzed after 2 days. (B) Wild-type mice were injected s.c. on the femur with LB inhibitors (Xanthohumol: 500 µg, or A922500: 150 µg), or DMSO vehicle control. Four hrs later, identical injections were given, this time combined with 300 µg endofree OVA protein or 40 µg OVA K<sup>b</sup> peptide, with or without 30 µg ISCOMs. After 12 hrs, CD11c<sup>+</sup> cells from lymph nodes were isolated and analyzed similar as under (A). Statistical analysis was done using two way ANOVA with post hoc Bonferroni tests.**

**A**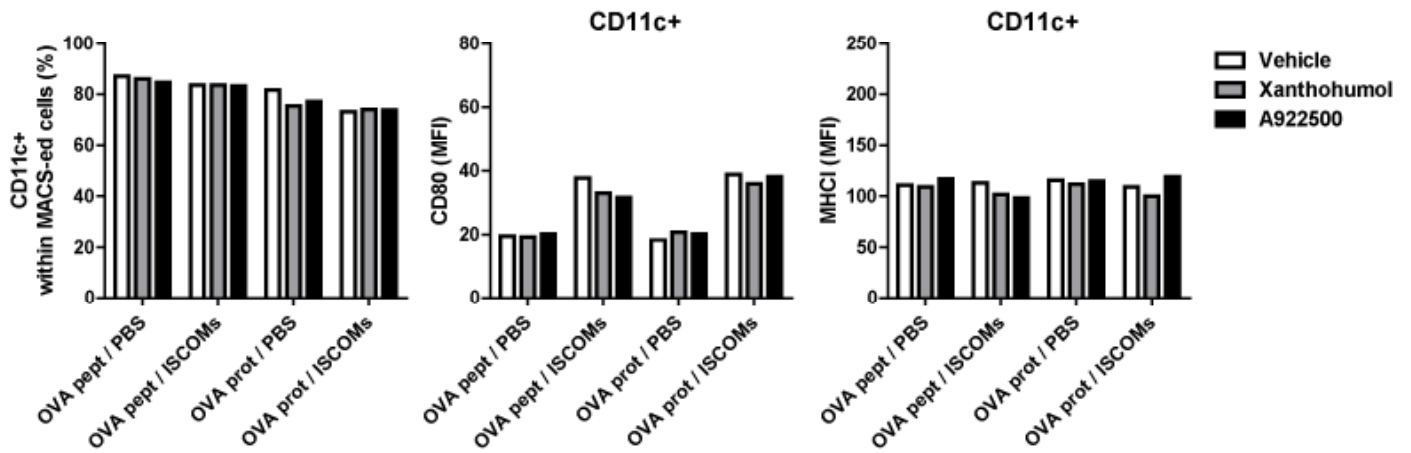**B**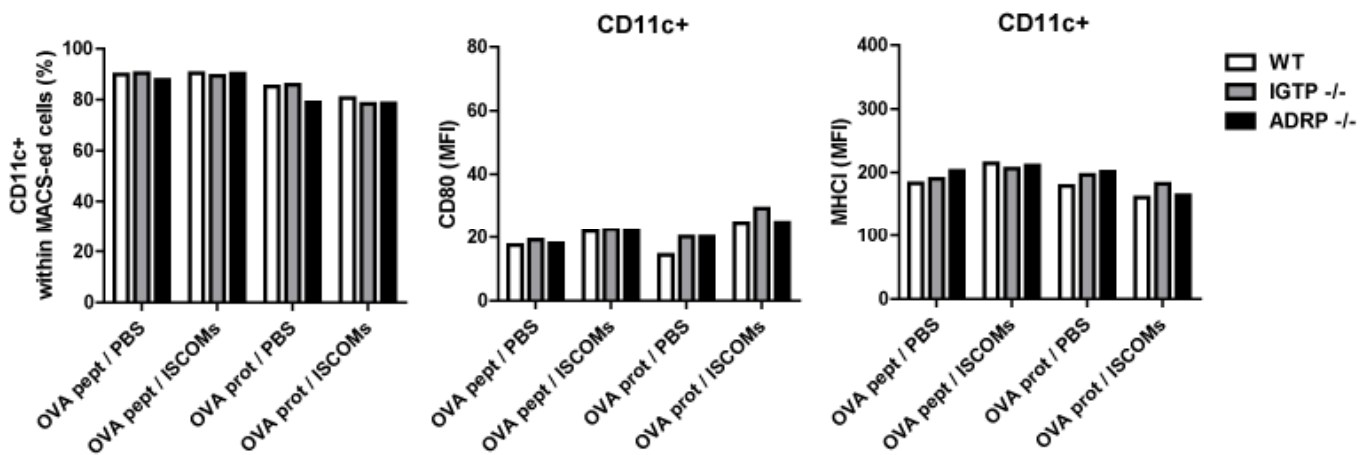

**Supplementary figure 15. CD11c percentage, or CD80/MHC-I expression of MACS sorted DCs is unchanged in LB inhibitor-treated mice or IGTP/ADRP knockouts.** FACS analysis of cells as isolated under figures 6J and S14. (A) Mice were injected s.c. on the femur with 500  $\mu$ g Xanthohumol, 150  $\mu$ g A922500, or DMSO vehicle control. Four hrs later, identical injections were given, this time combined with 300  $\mu$ g endofree OVA protein or 40  $\mu$ g OVA K<sup>b</sup> peptide, with or without 30  $\mu$ g ISCOMs. 12 hrs later, draining lymph nodes were harvested from which CD11c<sup>+</sup> cells were isolated by magnetic bead sorting. (B) Wild-type, IGTP<sup>-/-</sup>, or ADRP<sup>-/-</sup> knockout mice were injected with 300  $\mu$ g endofree OVA protein or 40  $\mu$ g OVA K<sup>b</sup> peptide, with or without 30  $\mu$ g ISCOMs. 12 hrs later, draining lymph nodes were harvested from which CD11c<sup>+</sup> cells were isolated. Data represent single values. Similar results were obtained in two independent experiments.



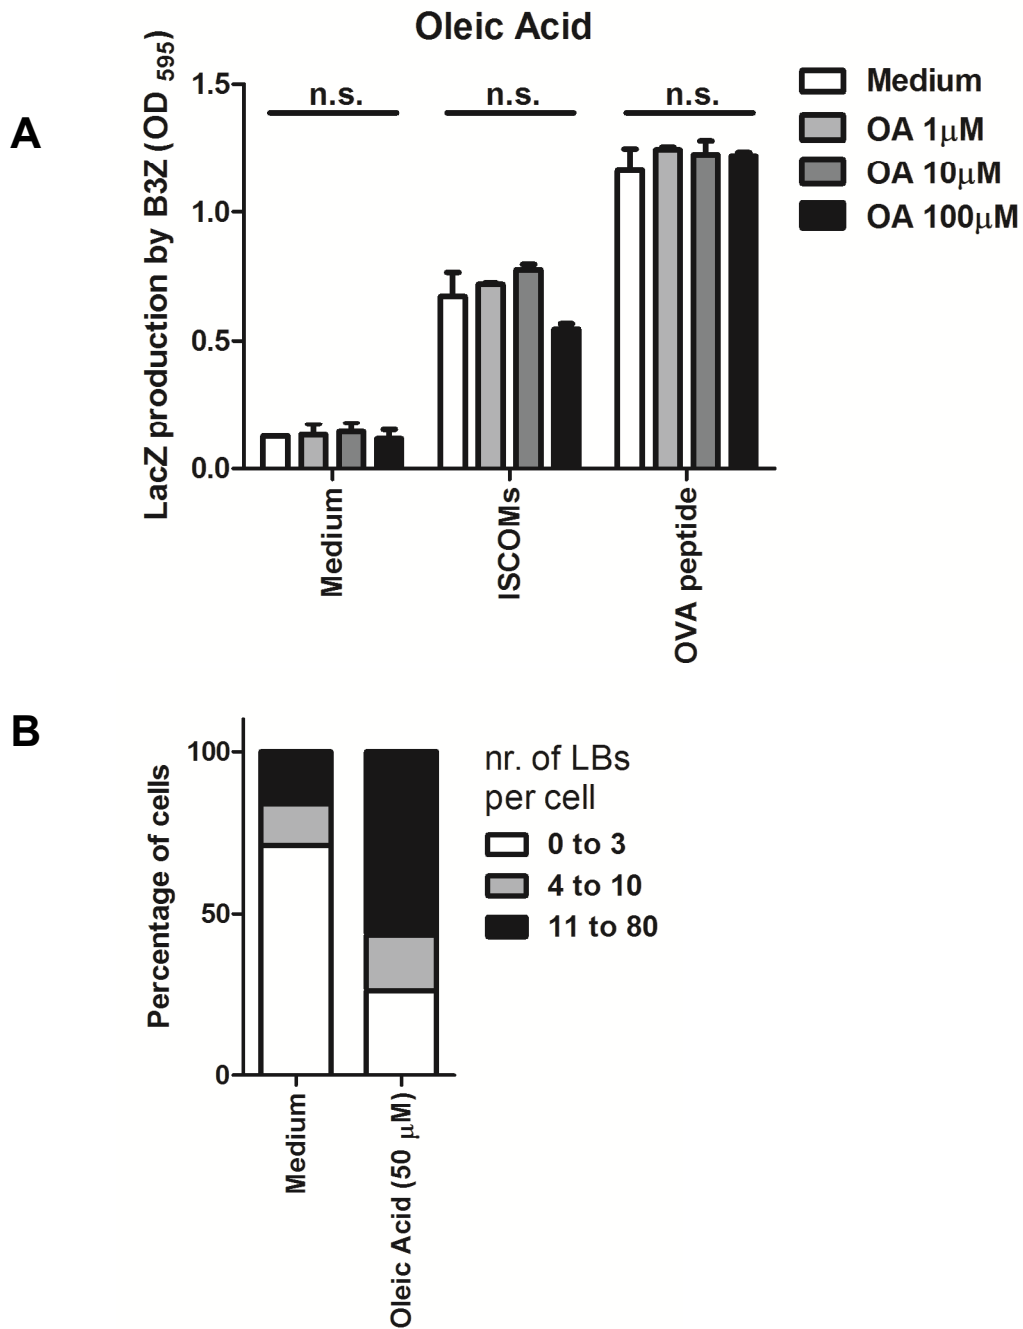

**Supplementary figure 16. Induction of lipid bodies with oleic acid does not induce cross-presentation, and has minor influence on SBA-induced cross-presentation.** *In vitro* cross-presentation assay (A) and quantification of LBs (B) in GM-CSF BMDCs following 5 hrs exposure to ISCOMs or 50  $\mu$ M oleic acid. Similar data were obtained in two independent experiments. Statistical analysis was done using two way ANOVA with post hoc Bonferroni tests.

## **Supplementary References**

**1:** *Mayer CT, et al. Selective and efficient generation of functional Batf3-dependent CD103+ dendritic cells from mouse bone marrow. Blood 124, 3081-3091 (2014).*
